# Supplementary material for: Prediction of atomic stress fields using cycle-consistent adversarial neural networks based on unpaired and unmatched sparse datasets
Source: Royal Society of Chemistry journal article supplement (doi:10.1039/d2ma00223j), 2022-01-01
Supplement: d2ma00223j2.pdf [file d2ma00223j2.pdf]

# Prediction of Atomic Stress Fields using Cycle-Consistent Adversarial Neural Networks based on Unpaired and Unmatched Sparse Datasets

Markus J. Buehler<sup>1,2\*</sup>

<sup>1</sup> Laboratory for Atomistic and Molecular Mechanics (LAMM), Massachusetts Institute of Technology, 77 Massachusetts Ave., Cambridge, MA 02139, USA

<sup>2</sup> Center for Computational Science and Engineering, Schwarzman College of Computing, Massachusetts Institute of Technology, 77 Massachusetts Ave., Cambridge, MA 02139, USA

\*[mbuehler@MIT.EDU](mailto:mbuehler@MIT.EDU)

**SUPPLEMENTARY INFORMATION**

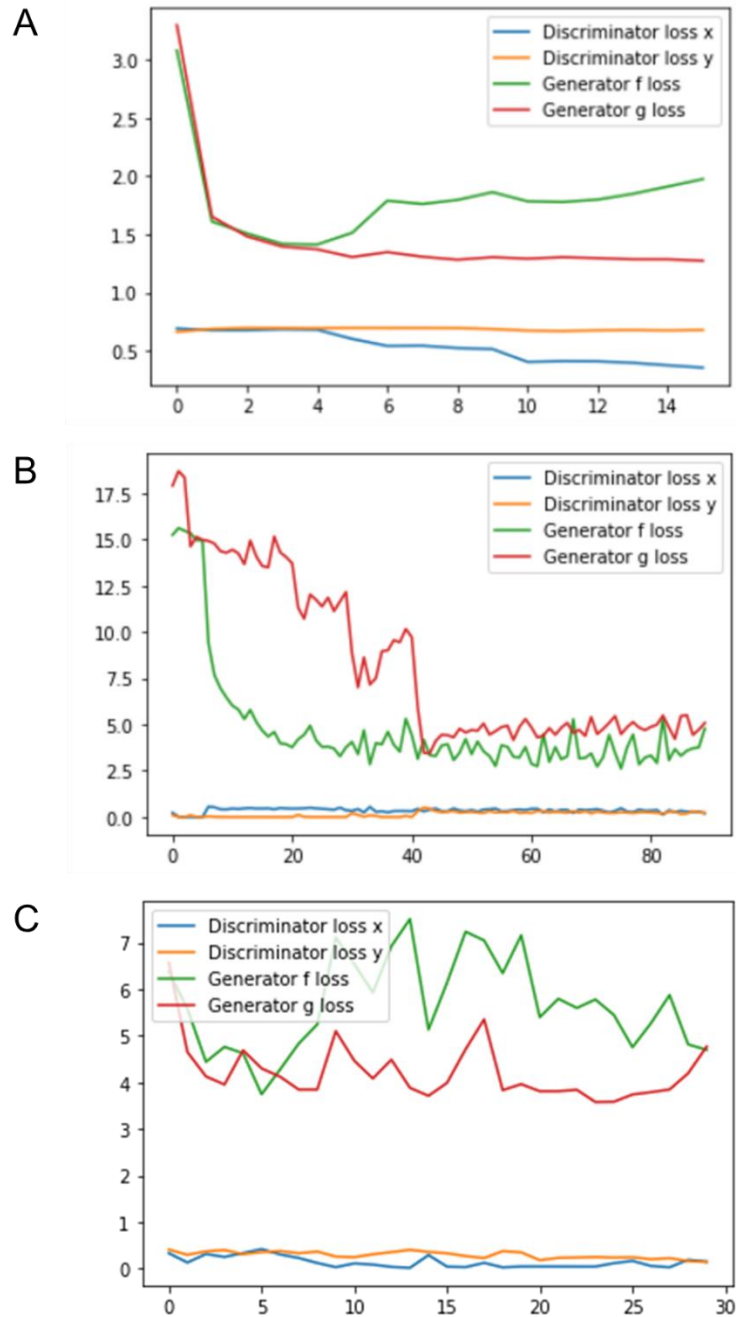

**Figure S1:** Training progression of the U-Net (A), ResNet (B), and U-Net-ResNet (C) neural networks. Note, the results shown in (C) are for the most challenging problem, training for deformation of the lattice while at the same time solving for the stress field. As can be seen, while training performance for A-B is generally good, performance for the third problem is more challenging.

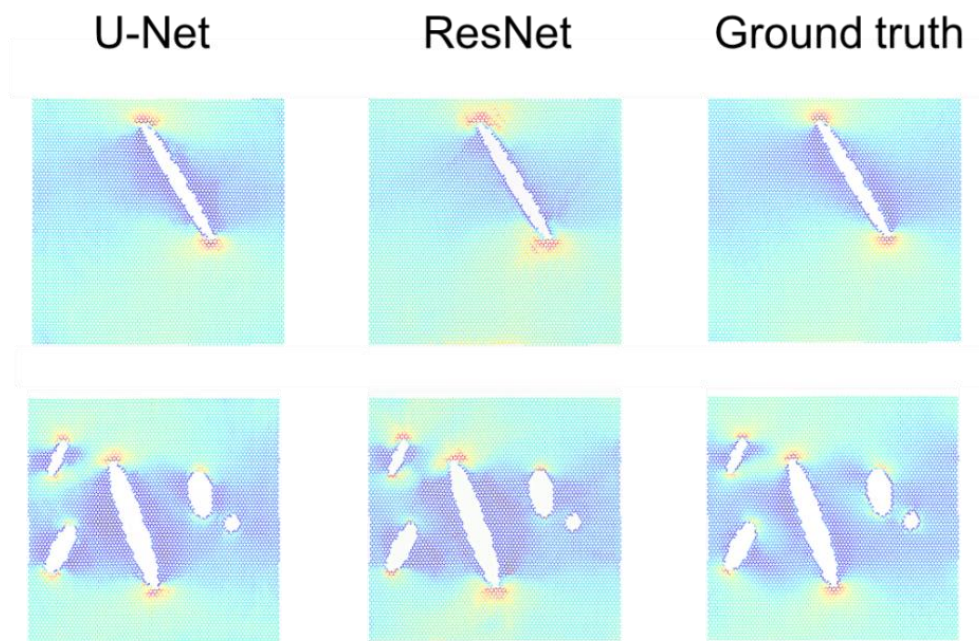

**Figure S2:** Direct comparison between predictions from the U-Net and ResNet generators, and comparison to ground truth data.

U-Net generator model:

| Layer (type)                    | Output Shape         | Param #  | Connected to                                                                                                                                                                                                                                                                                                                                                                                                    |
|---------------------------------|----------------------|----------|-----------------------------------------------------------------------------------------------------------------------------------------------------------------------------------------------------------------------------------------------------------------------------------------------------------------------------------------------------------------------------------------------------------------|
| input_1 (InputLayer)            | (None, None, None, 0 | 0        |                                                                                                                                                                                                                                                                                                                                                                                                                 |
| sequential (Sequential)         | (None, None, None, 6 | 3072     | input_1[0][0]                                                                                                                                                                                                                                                                                                                                                                                                   |
| sequential_1 (Sequential)       | (None, None, None, 1 | 131328   | sequential[0][0]                                                                                                                                                                                                                                                                                                                                                                                                |
| sequential_2 (Sequential)       | (None, None, None, 2 | 524800   | sequential_1[0][0]                                                                                                                                                                                                                                                                                                                                                                                              |
| sequential_3 (Sequential)       | (None, None, None, 5 | 2098176  | sequential_2[0][0]                                                                                                                                                                                                                                                                                                                                                                                              |
| sequential_4 (Sequential)       | (None, None, None, 5 | 4195328  | sequential_3[0][0]                                                                                                                                                                                                                                                                                                                                                                                              |
| sequential_5 (Sequential)       | (None, None, None, 1 | 8390656  | sequential_4[0][0]                                                                                                                                                                                                                                                                                                                                                                                              |
| sequential_6 (Sequential)       | (None, None, None, 1 | 16779264 | sequential_5[0][0]                                                                                                                                                                                                                                                                                                                                                                                              |
| sequential_7 (Sequential)       | (None, None, None, 1 | 16779264 | sequential_6[0][0]                                                                                                                                                                                                                                                                                                                                                                                              |
| sequential_8 (Sequential)       | (None, None, None, 1 | 16779264 | sequential_7[0][0]                                                                                                                                                                                                                                                                                                                                                                                              |
| sequential_9 (Sequential)       | (None, None, None, 1 | 16779264 | sequential_8[0][0]                                                                                                                                                                                                                                                                                                                                                                                              |
| sequential_10 (Sequential)      | (None, None, None, 1 | 16779264 | sequential_9[0][0]                                                                                                                                                                                                                                                                                                                                                                                              |
| concatenate (Concatenate)       | multiple             | 0        | sequential_10[0][0]<br>sequential_8[0][0]<br>sequential_11[0][0]<br>sequential_7[0][0]<br>sequential_12[0][0]<br>sequential_6[0][0]<br>sequential_13[0][0]<br>sequential_5[0][0]<br>sequential_14[0][0]<br>sequential_4[0][0]<br>sequential_15[0][0]<br>sequential_3[0][0]<br>sequential_16[0][0]<br>sequential_2[0][0]<br>sequential_17[0][0]<br>sequential_1[0][0]<br>sequential_18[0][0]<br>sequential[0][0] |
| sequential_11 (Sequential)      | (None, None, None, 1 | 33556480 | concatenate[0][0]                                                                                                                                                                                                                                                                                                                                                                                               |
| sequential_12 (Sequential)      | (None, None, None, 1 | 33556480 | concatenate[1][0]                                                                                                                                                                                                                                                                                                                                                                                               |
| sequential_13 (Sequential)      | (None, None, None, 1 | 33556480 | concatenate[2][0]                                                                                                                                                                                                                                                                                                                                                                                               |
| sequential_14 (Sequential)      | (None, None, None, 1 | 33556480 | concatenate[3][0]                                                                                                                                                                                                                                                                                                                                                                                               |
| sequential_15 (Sequential)      | (None, None, None, 5 | 12583936 | concatenate[4][0]                                                                                                                                                                                                                                                                                                                                                                                               |
| sequential_16 (Sequential)      | (None, None, None, 5 | 8389632  | concatenate[5][0]                                                                                                                                                                                                                                                                                                                                                                                               |
| sequential_17 (Sequential)      | (None, None, None, 2 | 3146240  | concatenate[6][0]                                                                                                                                                                                                                                                                                                                                                                                               |
| sequential_18 (Sequential)      | (None, None, None, 1 | 786688   | concatenate[7][0]                                                                                                                                                                                                                                                                                                                                                                                               |
| conv2d_transpose_10 (Conv2DTran | (None, None, None, 3 | 9219     | concatenate[8][0]                                                                                                                                                                                                                                                                                                                                                                                               |
| Total params: 258,381,315       |                      |          |                                                                                                                                                                                                                                                                                                                                                                                                                 |
| Trainable params: 258,381,315   |                      |          |                                                                                                                                                                                                                                                                                                                                                                                                                 |
| Non-trainable params: 0         |                      |          |                                                                                                                                                                                                                                                                                                                                                                                                                 |

**Figure S3:** U-Net generator architecture, featuring skip connections.

ResNet generator model:

| Layer (type)                    | Output Shape                 | Param # | Connected to                                           |
|---------------------------------|------------------------------|---------|--------------------------------------------------------|
| input_1 (InputLayer)            | (None, 1024, 1024, 0         |         |                                                        |
| conv2d (Conv2D)                 | (None, 1024, 1024, 6 9472    |         | input_1[0][0]                                          |
| instance_normalization (Instanc | (None, 1024, 1024, 6 128     |         | conv2d[0][0]                                           |
| activation (Activation)         | (None, 1024, 1024, 6 0       |         | instance_normalization[0][0]                           |
| conv2d_1 (Conv2D)               | (None, 512, 512, 128 73856   |         | activation[0][0]                                       |
| instance_normalization_1 (Insta | (None, 512, 512, 128 256     |         | conv2d_1[0][0]                                         |
| activation_1 (Activation)       | (None, 512, 512, 128 0       |         | instance_normalization_1[0][0]                         |
| conv2d_2 (Conv2D)               | (None, 256, 256, 256 295168  |         | activation_1[0][0]                                     |
| instance_normalization_2 (Insta | (None, 256, 256, 256 512     |         | conv2d_2[0][0]                                         |
| activation_2 (Activation)       | (None, 256, 256, 256 0       |         | instance_normalization_2[0][0]                         |
| conv2d_3 (Conv2D)               | (None, 256, 256, 256 590080  |         | activation_2[0][0]                                     |
| instance_normalization_3 (Insta | (None, 256, 256, 256 512     |         | conv2d_3[0][0]                                         |
| activation_3 (Activation)       | (None, 256, 256, 256 0       |         | instance_normalization_3[0][0]                         |
| conv2d_4 (Conv2D)               | (None, 256, 256, 256 590080  |         | activation_3[0][0]                                     |
| instance_normalization_4 (Insta | (None, 256, 256, 256 512     |         | conv2d_4[0][0]                                         |
| concatenate (Concatenate)       | (None, 256, 256, 512 0       |         | instance_normalization_4[0][0]<br>activation_2[0][0]   |
| conv2d_5 (Conv2D)               | (None, 256, 256, 256 1179904 |         | concatenate[0][0]                                      |
| instance_normalization_5 (Insta | (None, 256, 256, 256 512     |         | conv2d_5[0][0]                                         |
| activation_4 (Activation)       | (None, 256, 256, 256 0       |         | instance_normalization_5[0][0]                         |
| conv2d_6 (Conv2D)               | (None, 256, 256, 256 590080  |         | activation_4[0][0]                                     |
| instance_normalization_6 (Insta | (None, 256, 256, 256 512     |         | conv2d_6[0][0]                                         |
| concatenate_1 (Concatenate)     | (None, 256, 256, 768 0       |         | instance_normalization_6[0][0]<br>concatenate[0][0]    |
| conv2d_7 (Conv2D)               | (None, 256, 256, 256 1769728 |         | concatenate_1[0][0]                                    |
| instance_normalization_7 (Insta | (None, 256, 256, 256 512     |         | conv2d_7[0][0]                                         |
| activation_5 (Activation)       | (None, 256, 256, 256 0       |         | instance_normalization_7[0][0]                         |
| conv2d_8 (Conv2D)               | (None, 256, 256, 256 590080  |         | activation_5[0][0]                                     |
| instance_normalization_8 (Insta | (None, 256, 256, 256 512     |         | conv2d_8[0][0]                                         |
| concatenate_2 (Concatenate)     | (None, 256, 256, 102 0       |         | instance_normalization_8[0][0]<br>concatenate_1[0][0]  |
| conv2d_9 (Conv2D)               | (None, 256, 256, 256 2359552 |         | concatenate_2[0][0]                                    |
| instance_normalization_9 (Insta | (None, 256, 256, 256 512     |         | conv2d_9[0][0]                                         |
| activation_6 (Activation)       | (None, 256, 256, 256 0       |         | instance_normalization_9[0][0]                         |
| conv2d_10 (Conv2D)              | (None, 256, 256, 256 590080  |         | activation_6[0][0]                                     |
| instance_normalization_10 (Inst | (None, 256, 256, 256 512     |         | conv2d_10[0][0]                                        |
| concatenate_3 (Concatenate)     | (None, 256, 256, 128 0       |         | instance_normalization_10[0][0]<br>concatenate_2[0][0] |
| conv2d_11 (Conv2D)              | (None, 256, 256, 256 2949376 |         | concatenate_3[0][0]                                    |
| instance_normalization_11 (Inst | (None, 256, 256, 256 512     |         | conv2d_11[0][0]                                        |
| activation_7 (Activation)       | (None, 256, 256, 256 0       |         | instance_normalization_11[0][0]                        |
| conv2d_12 (Conv2D)              | (None, 256, 256, 256 590080  |         | activation_7[0][0]                                     |
| instance_normalization_12 (Inst | (None, 256, 256, 256 512     |         | conv2d_12[0][0]                                        |
| concatenate_4 (Concatenate)     | (None, 256, 256, 153 0       |         | instance_normalization_12[0][0]<br>concatenate_3[0][0] |
| conv2d_13 (Conv2D)              | (None, 256, 256, 256 3539200 |         | concatenate_4[0][0]                                    |
| instance_normalization_13 (Inst | (None, 256, 256, 256 512     |         | conv2d_13[0][0]                                        |
| activation_8 (Activation)       | (None, 256, 256, 256 0       |         | instance_normalization_13[0][0]                        |
| conv2d_14 (Conv2D)              | (None, 256, 256, 256 590080  |         | activation_8[0][0]                                     |
| instance_normalization_14 (Inst | (None, 256, 256, 256 512     |         | conv2d_14[0][0]                                        |
| concatenate_5 (Concatenate)     | (None, 256, 256, 179 0       |         | instance_normalization_14[0][0]<br>concatenate_4[0][0] |
| conv2d_15 (Conv2D)              | (None, 256, 256, 256 4129024 |         | concatenate_5[0][0]                                    |
| instance_normalization_15 (Inst | (None, 256, 256, 256 512     |         | conv2d_15[0][0]                                        |
| activation_9 (Activation)       | (None, 256, 256, 256 0       |         | instance_normalization_15[0][0]                        |
| conv2d_16 (Conv2D)              | (None, 256, 256, 256 590080  |         | activation_9[0][0]                                     |
| instance_normalization_16 (Inst | (None, 256, 256, 256 512     |         | conv2d_16[0][0]                                        |
| concatenate_6 (Concatenate)     | (None, 256, 256, 204 0       |         | instance_normalization_16[0][0]<br>concatenate_5[0][0] |
| conv2d_17 (Conv2D)              | (None, 256, 256, 256 4718848 |         | concatenate_6[0][0]                                    |

|                                 |                              |                                                        |
|---------------------------------|------------------------------|--------------------------------------------------------|
| instance_normalization_17 (Inst | (None, 256, 256, 256 512     | conv2d_17[0][0]                                        |
| activation_10 (Activation)      | (None, 256, 256, 256 0       | instance_normalization_17[0][0]                        |
| conv2d_18 (Conv2D)              | (None, 256, 256, 256 590080  | activation_10[0][0]                                    |
| instance_normalization_18 (Inst | (None, 256, 256, 256 512     | conv2d_18[0][0]                                        |
| concatenate_7 (Concatenate)     | (None, 256, 256, 230 0       | instance_normalization_18[0][0]<br>concatenate_6[0][0] |
| conv2d_19 (Conv2D)              | (None, 256, 256, 256 5308672 | concatenate_7[0][0]                                    |
| instance_normalization_19 (Inst | (None, 256, 256, 256 512     | conv2d_19[0][0]                                        |
| activation_11 (Activation)      | (None, 256, 256, 256 0       | instance_normalization_19[0][0]                        |
| conv2d_20 (Conv2D)              | (None, 256, 256, 256 590080  | activation_11[0][0]                                    |
| instance_normalization_20 (Inst | (None, 256, 256, 256 512     | conv2d_20[0][0]                                        |
| concatenate_8 (Concatenate)     | (None, 256, 256, 256 0       | instance_normalization_20[0][0]<br>concatenate_7[0][0] |
| conv2d_transpose (Conv2DTranspo | (None, 512, 512, 128 2949248 | concatenate_8[0][0]                                    |
| instance_normalization_21 (Inst | (None, 512, 512, 128 256     | conv2d_transpose[0][0]                                 |
| activation_12 (Activation)      | (None, 512, 512, 128 0       | instance_normalization_21[0][0]                        |
| conv2d_transpose_1 (Conv2DTrans | (None, 1024, 1024, 6 73792   | activation_12[0][0]                                    |
| instance_normalization_22 (Inst | (None, 1024, 1024, 6 128     | conv2d_transpose_1[0][0]                               |
| activation_13 (Activation)      | (None, 1024, 1024, 6 0       | instance_normalization_22[0][0]                        |
| conv2d_21 (Conv2D)              | (None, 1024, 1024, 3 9411    | activation_13[0][0]                                    |
| instance_normalization_23 (Inst | (None, 1024, 1024, 3 6       | conv2d_21[0][0]                                        |
| activation_14 (Activation)      | (None, 1024, 1024, 3 0       | instance_normalization_23[0][0]                        |
| =====                           |                              |                                                        |
| Total params: 35,276,553        |                              |                                                        |
| Trainable params: 35,276,553    |                              |                                                        |
| Non-trainable params: 0         |                              |                                                        |
| =====                           |                              |                                                        |

**Figure S4:** ResNet generator architecture (9 ResNet blocks)

U-Net-ResNet generator model:

| Layer (type)                                      | Output Shape                | Param #  | Connected to                                              |
|---------------------------------------------------|-----------------------------|----------|-----------------------------------------------------------|
| input_1 (InputLayer)                              | [(None, None, None, 3)]     | 0        | []                                                        |
| ResNetConv0_1 (Conv2D)                            | (None, None, None, 64)      | 1792     | ['input_1[0][0]']                                         |
| instance_normalization_19 (InstanceNormalization) | (None, None, None, 64)      | 128      | ['ResNetConv0_1[0][0]']                                   |
| activation (Activation)                           | (None, None, None, 64)      | 0        | ['instance_normalization_19[0][0]']                       |
| ResNetConv0_2 (Conv2D)                            | (None, None, None, 64)      | 36928    | ['activation[0][0]']                                      |
| instance_normalization_20 (InstanceNormalization) | (None, None, None, 64)      | 128      | ['ResNetConv0_2[0][0]']                                   |
| concatenate_1 (Concatenate)                       | (None, None, None, 67)      | 0        | ['instance_normalization_20[0][0]', 'input_1[0][0]']      |
| sequential (Sequential)                           | (None, None, None, 64)      | 68608    | ['concatenate_1[0][0]']                                   |
| sequential_1 (Sequential)                         | (None, None, None, 128)     | 131328   | ['sequential[0][0]']                                      |
| ResNetConv1_1 (Conv2D)                            | (None, None, None, 256)     | 295168   | ['sequential_1[0][0]']                                    |
| instance_normalization_21 (InstanceNormalization) | (None, None, None, 256)     | 512      | ['ResNetConv1_1[0][0]']                                   |
| activation_1 (Activation)                         | (None, None, None, 256)     | 0        | ['instance_normalization_21[0][0]']                       |
| ResNetConv1_2 (Conv2D)                            | (None, None, None, 256)     | 590080   | ['activation_1[0][0]']                                    |
| instance_normalization_22 (InstanceNormalization) | (None, None, None, 256)     | 512      | ['ResNetConv1_2[0][0]']                                   |
| concatenate_2 (Concatenate)                       | (None, None, None, 384)     | 0        | ['instance_normalization_22[0][0]', 'sequential_1[0][0]'] |
| sequential_2 (Sequential)                         | (None, None, None, 256)     | 1573376  | ['concatenate_2[0][0]']                                   |
| sequential_3 (Sequential)                         | (None, None, None, 512)     | 2098176  | ['sequential_2[0][0]']                                    |
| ResNetConv2_1 (Conv2D)                            | (None, None, None, 512)     | 2359808  | ['sequential_3[0][0]']                                    |
| instance_normalization_23 (InstanceNormalization) | (None, None, None, 512)     | 1024     | ['ResNetConv2_1[0][0]']                                   |
| activation_2 (Activation)                         | (None, None, None, 512)     | 0        | ['instance_normalization_23[0][0]']                       |
| ResNetConv2_2 (Conv2D)                            | (None, None, None, 512)     | 2359808  | ['activation_2[0][0]']                                    |
| instance_normalization_24 (InstanceNormalization) | (None, None, None, 512)     | 1024     | ['ResNetConv2_2[0][0]']                                   |
| concatenate_3 (Concatenate)                       | (None, None, None, 1024)    | 0        | ['instance_normalization_24[0][0]', 'sequential_3[0][0]'] |
| sequential_4 (Sequential)                         | (None, None, None, 512)     | 8389632  | ['concatenate_3[0][0]']                                   |
| sequential_5 (Sequential)                         | (None, None, None, 1024)    | 8390656  | ['sequential_4[0][0]']                                    |
| ResNetConv3_1 (Conv2D)                            | (None, None, None, 1024)    | 9438208  | ['sequential_5[0][0]']                                    |
| instance_normalization_25 (InstanceNormalization) | (None, None, None, 1024)    | 2048     | ['ResNetConv3_1[0][0]']                                   |
| activation_3 (Activation)                         | (None, None, None, 1024)    | 0        | ['instance_normalization_25[0][0]']                       |
| ResNetConv3_2 (Conv2D)                            | (None, None, None, 1024)    | 9438208  | ['activation_3[0][0]']                                    |
| instance_normalization_26 (InstanceNormalization) | (None, None, None, 1024)    | 2048     | ['ResNetConv3_2[0][0]']                                   |
| concatenate_4 (Concatenate)                       | (None, None, None, 2048)    | 0        | ['instance_normalization_26[0][0]', 'sequential_5[0][0]'] |
| sequential_6 (Sequential)                         | (None, None, None, 1024)    | 33556480 | ['concatenate_4[0][0]']                                   |
| sequential_7 (Sequential)                         | (None, None, None, 1024)    | 16779264 | ['sequential_6[0][0]']                                    |
| ResNetConv4_1 (Conv2D)                            | (None, None, None, 1024)    | 9438208  | ['sequential_7[0][0]']                                    |
| instance_normalization_27 (InstanceNormalization) | (None, None, None, 1024)    | 2048     | ['ResNetConv4_1[0][0]']                                   |
| activation_4 (Activation)                         | (None, None, None, 1024)    | 0        | ['instance_normalization_27[0][0]']                       |
| ResNetConv4_2 (Conv2D)                            | (None, None, None, 9438208) | 9438208  | ['activation_4[0][0]']                                    |

|                                                   |                          |          |  |                                                                                                                                                                                                                                                                                                                                                                                                                                                                        |
|---------------------------------------------------|--------------------------|----------|--|------------------------------------------------------------------------------------------------------------------------------------------------------------------------------------------------------------------------------------------------------------------------------------------------------------------------------------------------------------------------------------------------------------------------------------------------------------------------|
|                                                   |                          | 1024)    |  |                                                                                                                                                                                                                                                                                                                                                                                                                                                                        |
| instance_normalization_28 (InstanceNormalization) | (None, None, None, 1024) | 2048     |  | ['ResNetConv4_2[0][0]']                                                                                                                                                                                                                                                                                                                                                                                                                                                |
| concatenate_5 (Concatenate)                       | (None, None, None, 2048) | 0        |  | ['instance_normalization_28[0][0]',<br>'sequential_7[0][0]']                                                                                                                                                                                                                                                                                                                                                                                                           |
| sequential_8 (Sequential)                         | (None, None, None, 1024) | 33556480 |  | ['concatenate_5[0][0]']                                                                                                                                                                                                                                                                                                                                                                                                                                                |
| sequential_9 (Sequential)                         | (None, None, None, 1024) | 16779264 |  | ['sequential_8[0][0]']                                                                                                                                                                                                                                                                                                                                                                                                                                                 |
| ResNetConv5_1 (Conv2D)                            | (None, None, None, 1024) | 9438208  |  | ['sequential_9[0][0]']                                                                                                                                                                                                                                                                                                                                                                                                                                                 |
| instance_normalization_29 (InstanceNormalization) | (None, None, None, 1024) | 2048     |  | ['ResNetConv5_1[0][0]']                                                                                                                                                                                                                                                                                                                                                                                                                                                |
| activation_5 (Activation)                         | (None, None, None, 1024) | 0        |  | ['instance_normalization_29[0][0]']                                                                                                                                                                                                                                                                                                                                                                                                                                    |
| ResNetConv5_2 (Conv2D)                            | (None, None, None, 1024) | 9438208  |  | ['activation_5[0][0]']                                                                                                                                                                                                                                                                                                                                                                                                                                                 |
| instance_normalization_30 (InstanceNormalization) | (None, None, None, 1024) | 2048     |  | ['ResNetConv5_2[0][0]']                                                                                                                                                                                                                                                                                                                                                                                                                                                |
| concatenate_6 (Concatenate)                       | (None, None, None, 2048) | 0        |  | ['instance_normalization_30[0][0]',<br>'sequential_9[0][0]']                                                                                                                                                                                                                                                                                                                                                                                                           |
| ResNetConv6_1 (Conv2D)                            | (None, None, None, 1024) | 18875392 |  | ['concatenate_6[0][0]']                                                                                                                                                                                                                                                                                                                                                                                                                                                |
| instance_normalization_31 (InstanceNormalization) | (None, None, None, 1024) | 2048     |  | ['ResNetConv6_1[0][0]']                                                                                                                                                                                                                                                                                                                                                                                                                                                |
| activation_6 (Activation)                         | (None, None, None, 1024) | 0        |  | ['instance_normalization_31[0][0]']                                                                                                                                                                                                                                                                                                                                                                                                                                    |
| ResNetConv6_2 (Conv2D)                            | (None, None, None, 1024) | 9438208  |  | ['activation_6[0][0]']                                                                                                                                                                                                                                                                                                                                                                                                                                                 |
| instance_normalization_32 (InstanceNormalization) | (None, None, None, 1024) | 2048     |  | ['ResNetConv6_2[0][0]']                                                                                                                                                                                                                                                                                                                                                                                                                                                |
| concatenate_7 (Concatenate)                       | (None, None, None, 3072) | 0        |  | ['instance_normalization_32[0][0]',<br>'concatenate_6[0][0]']                                                                                                                                                                                                                                                                                                                                                                                                          |
| ResNetConv7_1 (Conv2D)                            | (None, None, None, 1024) | 28312576 |  | ['concatenate_7[0][0]']                                                                                                                                                                                                                                                                                                                                                                                                                                                |
| instance_normalization_33 (InstanceNormalization) | (None, None, None, 1024) | 2048     |  | ['ResNetConv7_1[0][0]']                                                                                                                                                                                                                                                                                                                                                                                                                                                |
| activation_7 (Activation)                         | (None, None, None, 1024) | 0        |  | ['instance_normalization_33[0][0]']                                                                                                                                                                                                                                                                                                                                                                                                                                    |
| ResNetConv7_2 (Conv2D)                            | (None, None, None, 1024) | 9438208  |  | ['activation_7[0][0]']                                                                                                                                                                                                                                                                                                                                                                                                                                                 |
| instance_normalization_34 (InstanceNormalization) | (None, None, None, 1024) | 2048     |  | ['ResNetConv7_2[0][0]']                                                                                                                                                                                                                                                                                                                                                                                                                                                |
| concatenate_8 (Concatenate)                       | (None, None, None, 4096) | 0        |  | ['instance_normalization_34[0][0]',<br>'concatenate_7[0][0]']                                                                                                                                                                                                                                                                                                                                                                                                          |
| sequential_10 (Sequential)                        | (None, None, None, 1024) | 67110912 |  | ['concatenate_8[0][0]']                                                                                                                                                                                                                                                                                                                                                                                                                                                |
| concatenate (Concatenate)                         | multiple                 | 0        |  | ['sequential_10[0][0]',<br>'sequential_8[0][0]',<br>'sequential_11[0][0]',<br>'sequential_7[0][0]',<br>'sequential_12[0][0]',<br>'sequential_6[0][0]',<br>'sequential_13[0][0]',<br>'sequential_5[0][0]',<br>'sequential_14[0][0]',<br>'sequential_4[0][0]',<br>'sequential_15[0][0]',<br>'sequential_3[0][0]',<br>'sequential_16[0][0]',<br>'sequential_2[0][0]',<br>'sequential_17[0][0]',<br>'sequential_1[0][0]',<br>'sequential_18[0][0]',<br>'sequential[0][0]'] |
| sequential_11 (Sequential)                        | (None, None, None, 1024) | 33556480 |  | ['concatenate[0][0]']                                                                                                                                                                                                                                                                                                                                                                                                                                                  |
| ResNetConv8_1 (Conv2D)                            | (None, None, None, 1024) | 18875392 |  | ['concatenate[1][0]']                                                                                                                                                                                                                                                                                                                                                                                                                                                  |
| instance_normalization_35 (InstanceNormalization) | (None, None, None, 1024) | 2048     |  | ['ResNetConv8_1[0][0]']                                                                                                                                                                                                                                                                                                                                                                                                                                                |
| activation_8 (Activation)                         | (None, None, None, 1024) | 0        |  | ['instance_normalization_35[0][0]']                                                                                                                                                                                                                                                                                                                                                                                                                                    |
| ResNetConv8_2 (Conv2D)                            | (None, None, None, 1024) | 9438208  |  | ['activation_8[0][0]']                                                                                                                                                                                                                                                                                                                                                                                                                                                 |
| instance_normalization_36 (InstanceNormalization) | (None, None, None, 1024) | 2048     |  | ['ResNetConv8_2[0][0]']                                                                                                                                                                                                                                                                                                                                                                                                                                                |
| concatenate_9 (Concatenate)                       | (None, None, None, 3072) | 0        |  | ['instance_normalization_36[0][0]',<br>'concatenate[1][0]']                                                                                                                                                                                                                                                                                                                                                                                                            |
| sequential_12 (Sequential)                        | (None, None, None, 1024) | 50333696 |  | ['concatenate_9[0][0]']                                                                                                                                                                                                                                                                                                                                                                                                                                                |



```

1024)
sequential_13 (Sequential)      (None, None, None, 33556480 ['concatenate[2][0]']
1024)
ResNetConv9_1 (Conv2D)         (None, None, None, 18875392 ['concatenate[3][0]']
1024)
instance_normalization_37 (Ins (None, None, None, 2048 ['ResNetConv9_1[0][0]']
tanceNormalization)          1024)
activation_9 (Activation)      (None, None, None, 0 ['instance_normalization_37[0][0]']
1024)
ResNetConv9_2 (Conv2D)         (None, None, None, 9438208 ['activation_9[0][0]']
1024)
instance_normalization_38 (Ins (None, None, None, 2048 ['ResNetConv9_2[0][0]']
tanceNormalization)          1024)
concatenate_10 (Concatenate)  (None, None, None, 0 ['instance_normalization_38[0][0]']
3072)
sequential_14 (Sequential)      (None, None, None, 50333696 ['concatenate_10[0][0]']
1024)
sequential_15 (Sequential)      (None, None, None, 12583936 ['concatenate[4][0]']
512)
ResNetConv10_1 (Conv2D)        (None, None, None, 4719104 ['concatenate[5][0]']
512)
instance_normalization_39 (Ins (None, None, None, 1024 ['ResNetConv10_1[0][0]']
tanceNormalization)          512)
activation_10 (Activation)     (None, None, None, 0 ['instance_normalization_39[0][0]']
512)
ResNetConv10_2 (Conv2D)        (None, None, None, 2359808 ['activation_10[0][0]']
512)
instance_normalization_40 (Ins (None, None, None, 1024 ['ResNetConv10_2[0][0]']
tanceNormalization)          512)
concatenate_11 (Concatenate)  (None, None, None, 0 ['instance_normalization_40[0][0]']
1536)
sequential_16 (Sequential)      (None, None, None, 12583936 ['concatenate_11[0][0]']
512)
sequential_17 (Sequential)      (None, None, None, 3146240 ['concatenate[6][0]']
256)
ResNetConv11_1 (Conv2D)        (None, None, None, 442496 ['concatenate[7][0]']
128)
instance_normalization_41 (Ins (None, None, None, 256 ['ResNetConv11_1[0][0]']
tanceNormalization)          128)
activation_11 (Activation)     (None, None, None, 0 ['instance_normalization_41[0][0]']
128)
ResNetConv11_2 (Conv2D)        (None, None, None, 147584 ['activation_11[0][0]']
128)
instance_normalization_42 (Ins (None, None, None, 256 ['ResNetConv11_2[0][0]']
tanceNormalization)          128)
concatenate_12 (Concatenate)  (None, None, None, 0 ['instance_normalization_42[0][0]']
512)
sequential_18 (Sequential)      (None, None, None, 1048832 ['concatenate_12[0][0]']
128)
conv2d_transpose_10 (Conv2DTra (None, None, None, 9219 ['concatenate[8][0]']
nspose)                       3)
=====
Total params: 578,254,659
Trainable params: 578,254,659
Non-trainable params: 0
=====

```

**Figure S5:** U-Net-ResNet architecture used as a generator.

Discriminator model:

| Layer (type)                                      | Output Shape            | Param # |
|---------------------------------------------------|-------------------------|---------|
| input_6 (InputLayer)                              | [(None, 1024, 1024, 3)] | 0       |
| conv2d_46 (Conv2D)                                | (None, 512, 512, 64)    | 3136    |
| leaky_re_lu_45 (LeakyReLU)                        | (None, 512, 512, 64)    | 0       |
| conv2d_47 (Conv2D)                                | (None, 256, 256, 128)   | 131200  |
| instance_normalization_80 (InstanceNormalization) | (None, 256, 256, 128)   | 256     |
| leaky_re_lu_46 (LeakyReLU)                        | (None, 256, 256, 128)   | 0       |
| conv2d_48 (Conv2D)                                | (None, 128, 128, 256)   | 524544  |
| instance_normalization_81 (InstanceNormalization) | (None, 128, 128, 256)   | 512     |
| leaky_re_lu_47 (LeakyReLU)                        | (None, 128, 128, 256)   | 0       |
| conv2d_49 (Conv2D)                                | (None, 64, 64, 512)     | 2097664 |
| instance_normalization_82 (InstanceNormalization) | (None, 64, 64, 512)     | 1024    |
| leaky_re_lu_48 (LeakyReLU)                        | (None, 64, 64, 512)     | 0       |
| conv2d_50 (Conv2D)                                | (None, 64, 64, 512)     | 4194816 |
| instance_normalization_83 (InstanceNormalization) | (None, 64, 64, 512)     | 1024    |
| leaky_re_lu_49 (LeakyReLU)                        | (None, 64, 64, 512)     | 0       |
| conv2d_51 (Conv2D)                                | (None, 64, 64, 1)       | 8193    |

=====  
Total params: 6,962,369  
Trainable params: 6,962,369  
Non-trainable params: 0  
=====

**Figure S6:** Discriminator architecture used in the adversarial neural network.
